# Supplementary material for: MTGR1 is required to maintain small intestinal stem cell populations
Source: PubMed Central journal article supplement (PMC11369156; doi:10.1038/s41418-024-01346-x), 2024-07-25

**Supplemental Data** associated with:

MTGR1 is required to maintain small intestinal stem cell populations.

Sarah P. Short, Rachel E. Brown, Zhengyi Chen, Jennifer M. Pilat, Bailey A. McElligott, Leslie M. Meenderink, Alexander C. Bickhard, Koral M. Blunt, Justin Jacobse, Jing Wang, Alan J. Simmons, Yanwen Yu, Yilin Yang, Bobak Parang, Yash A. Choksi, Ken S. Lau, Scott W. Hiebert, and Christopher S. Williams

# Supplemental Figure 1

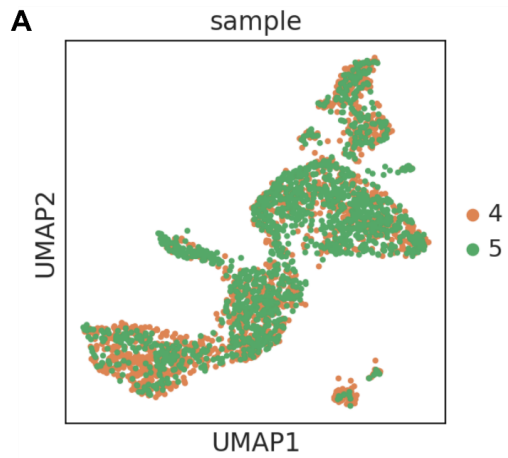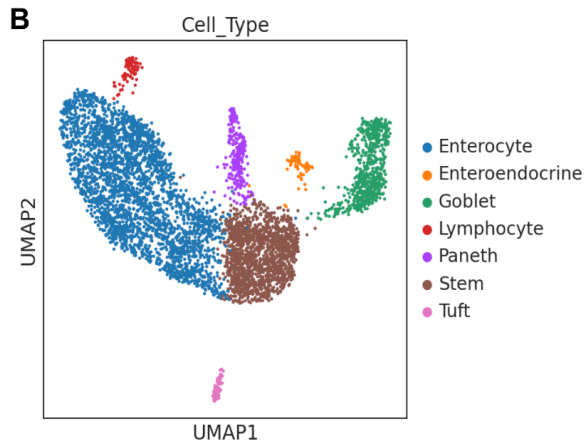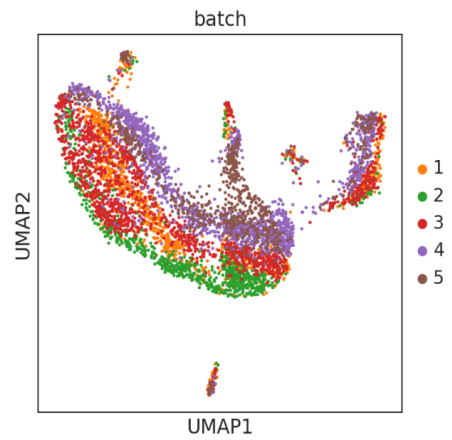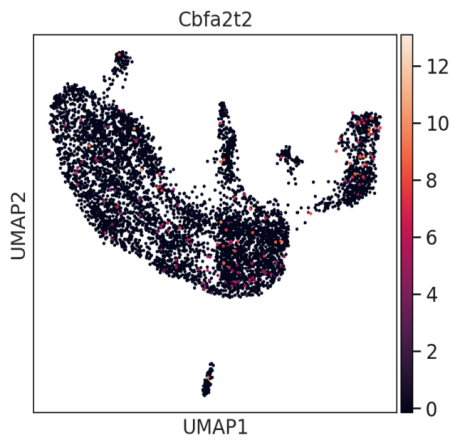

# Supplemental Figure 2

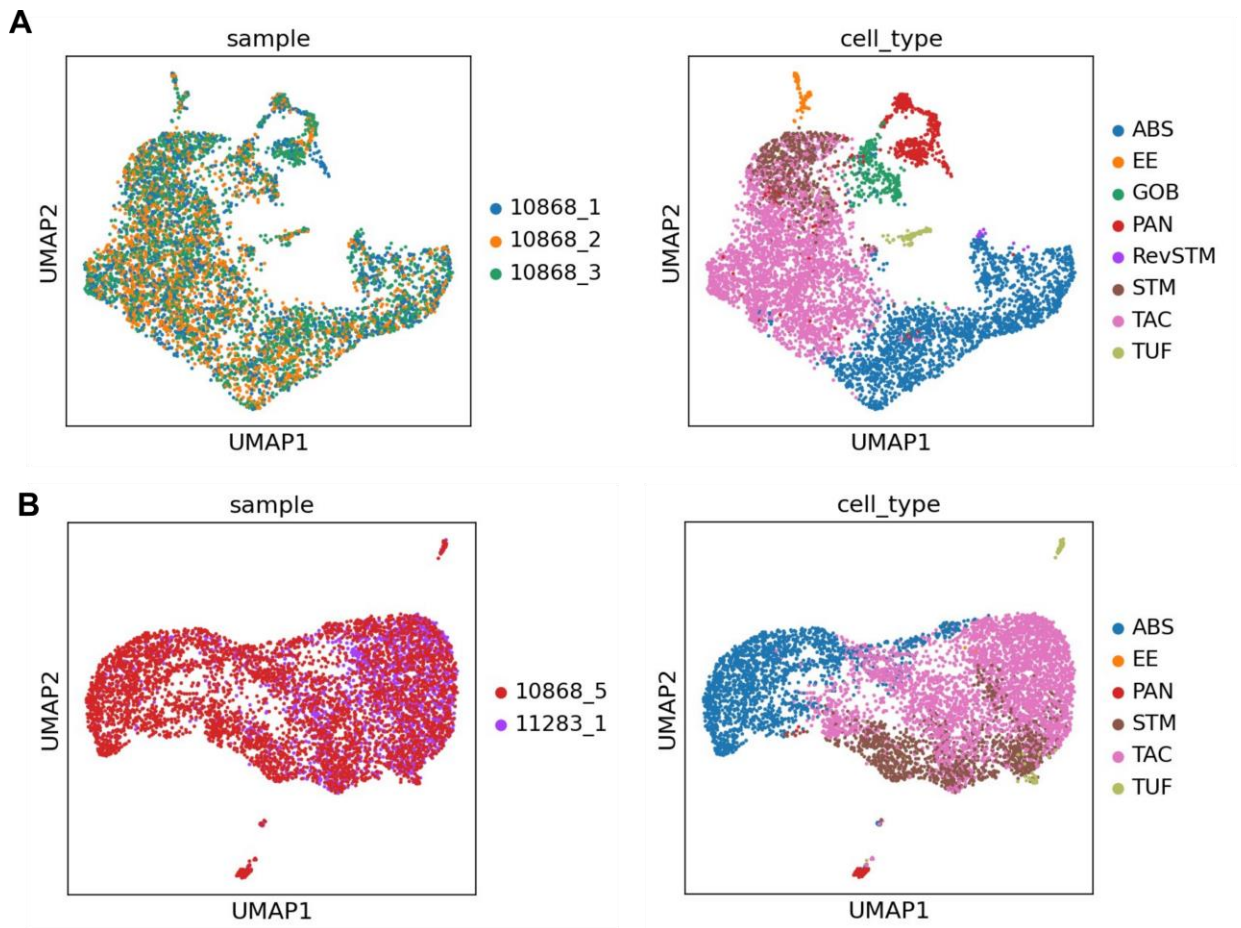

# Supplemental Figure 3

## A

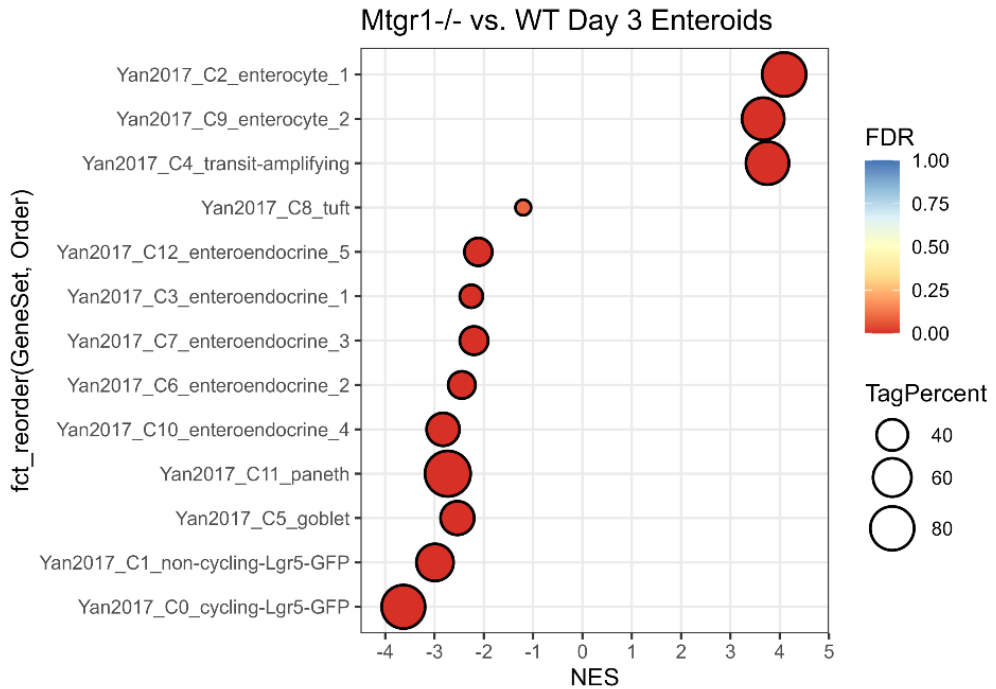

## B

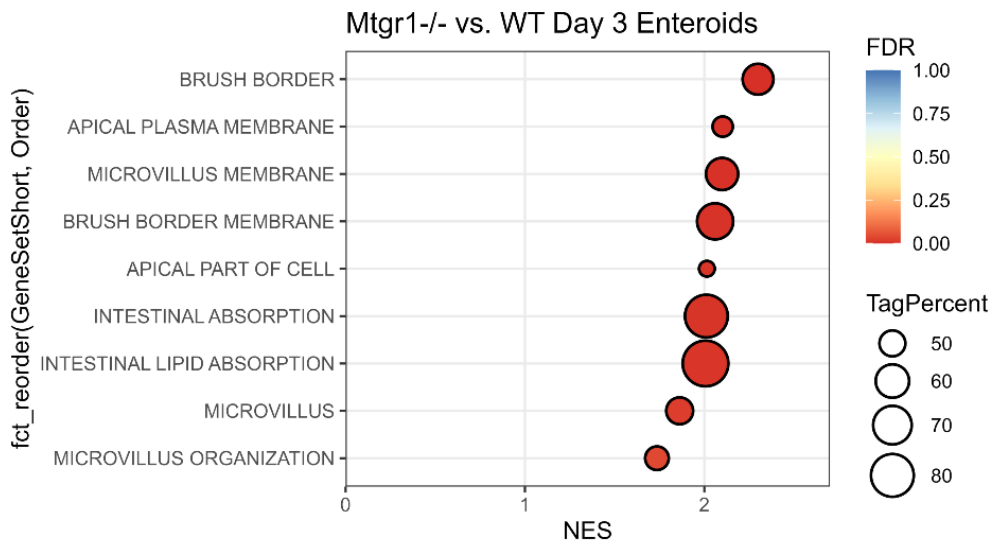

# Supplemental Figure 4

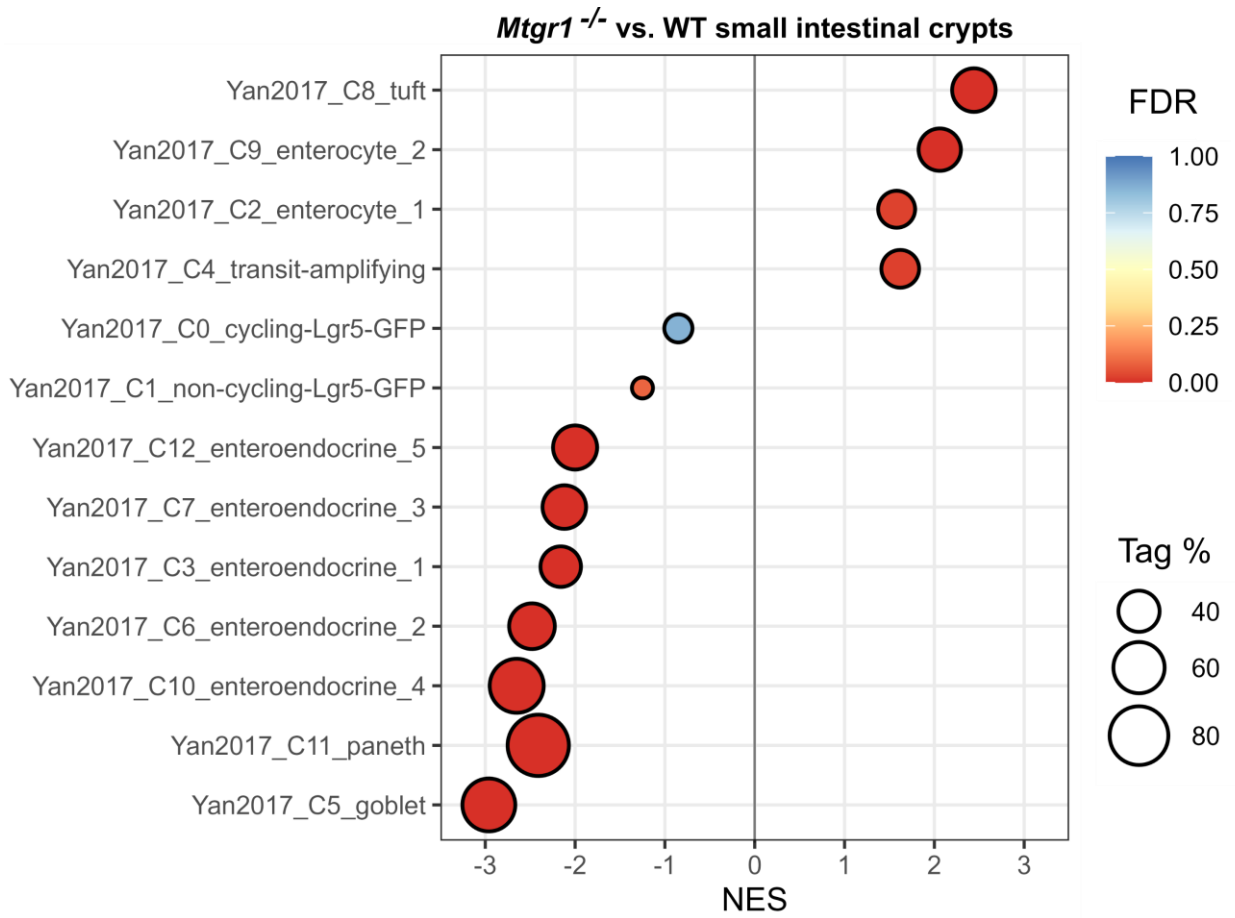

# Supplemental Figure 5

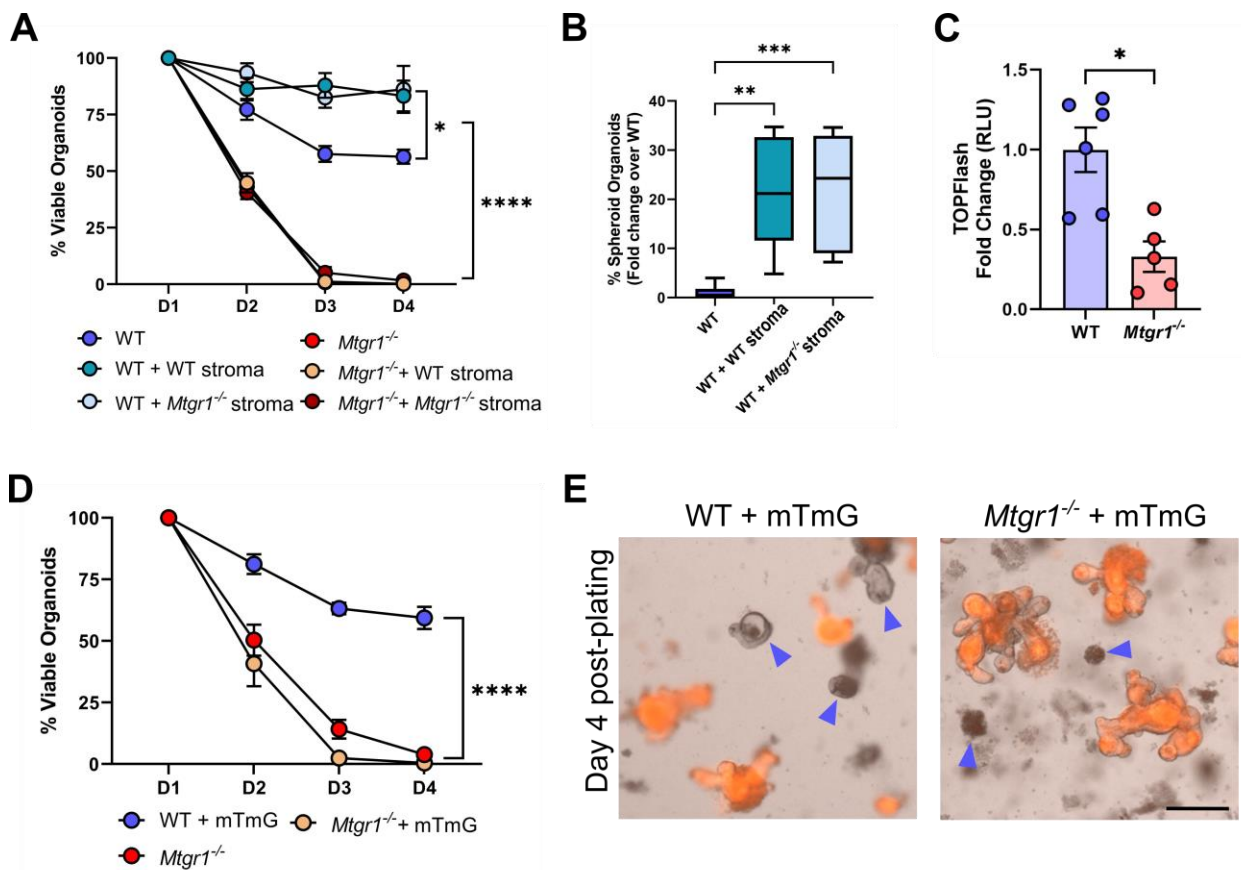

# Supplemental Figure 6

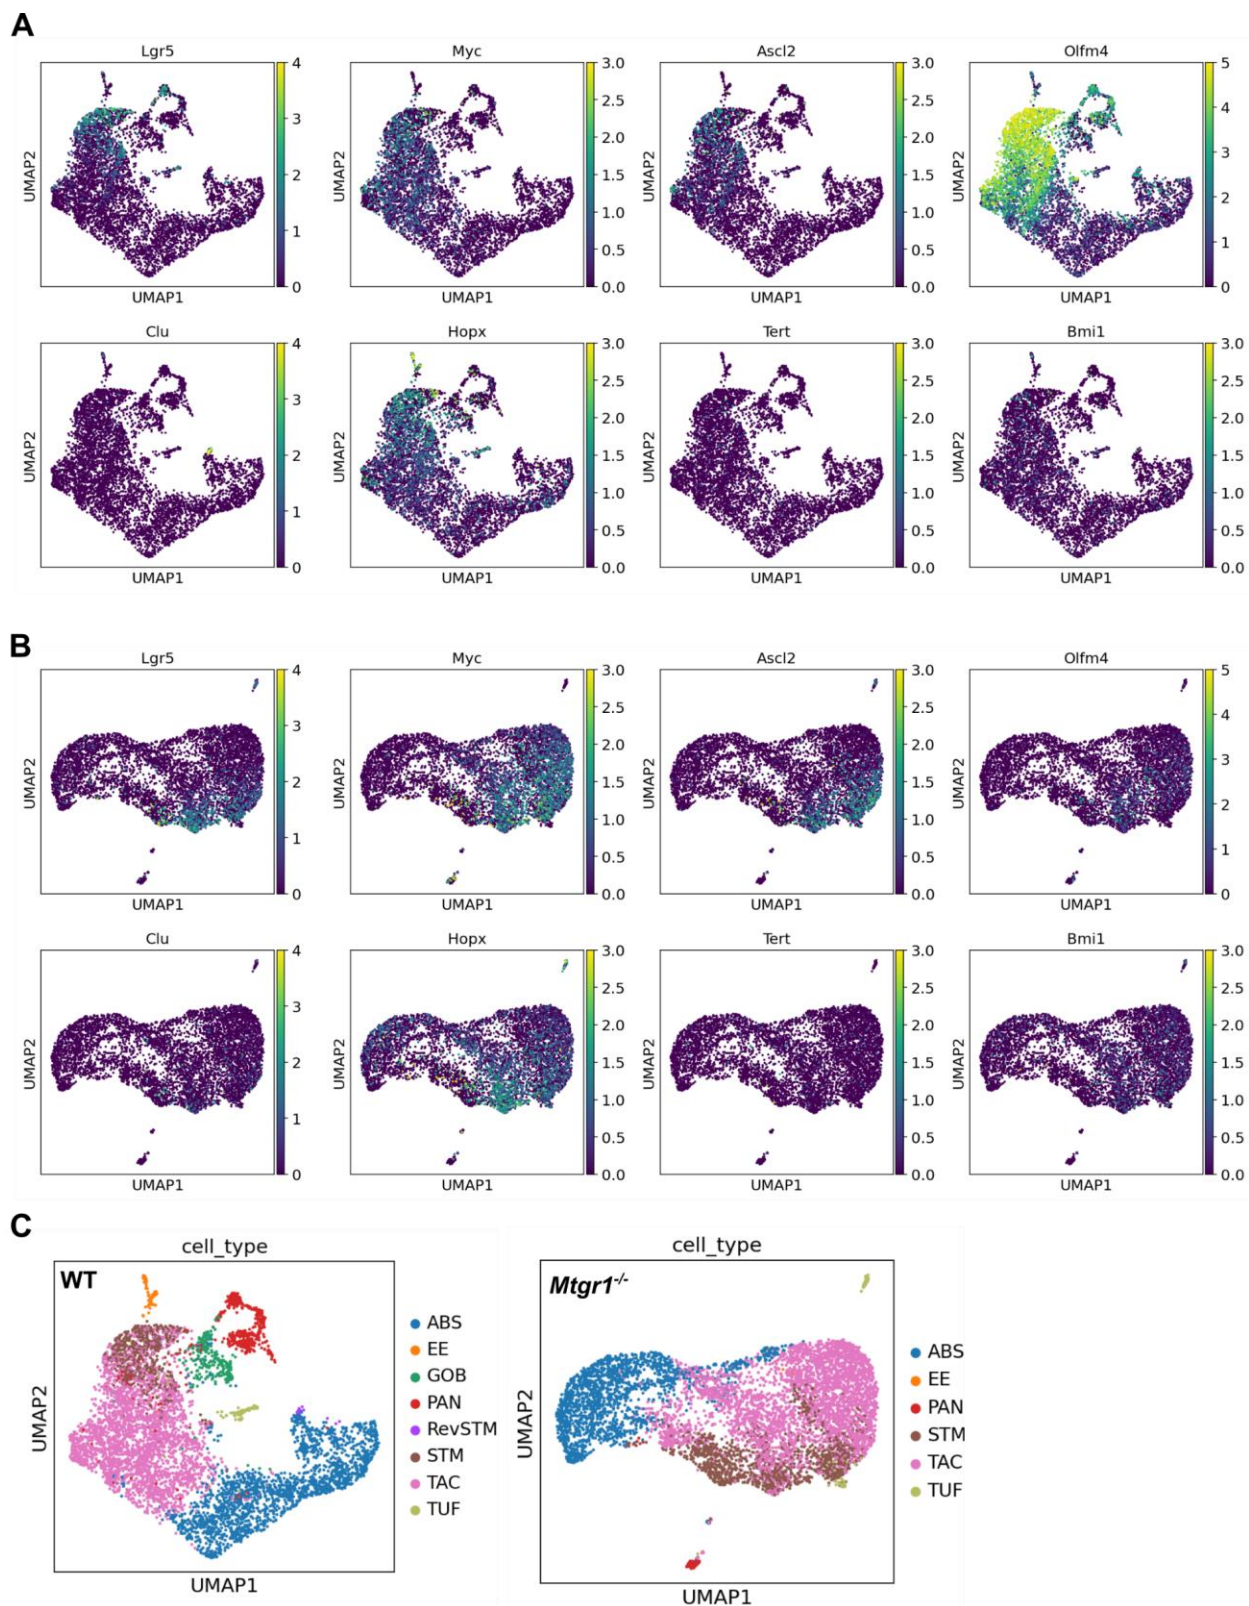

# Supplemental Figure 7

A

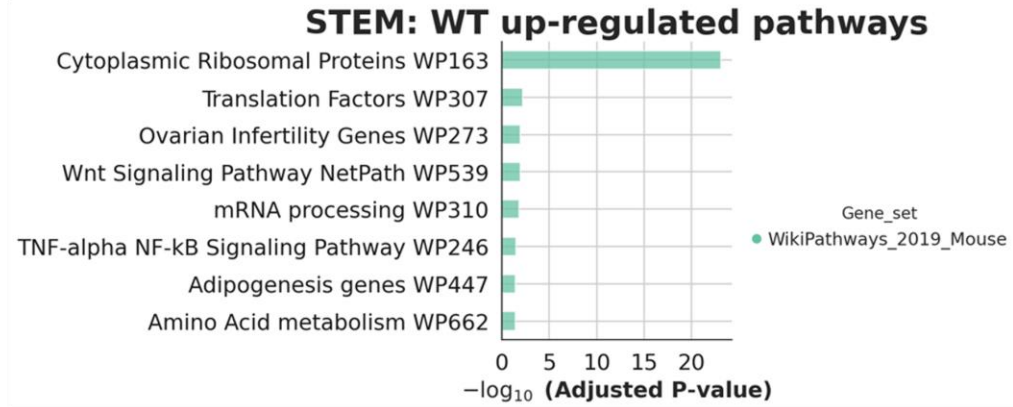

B

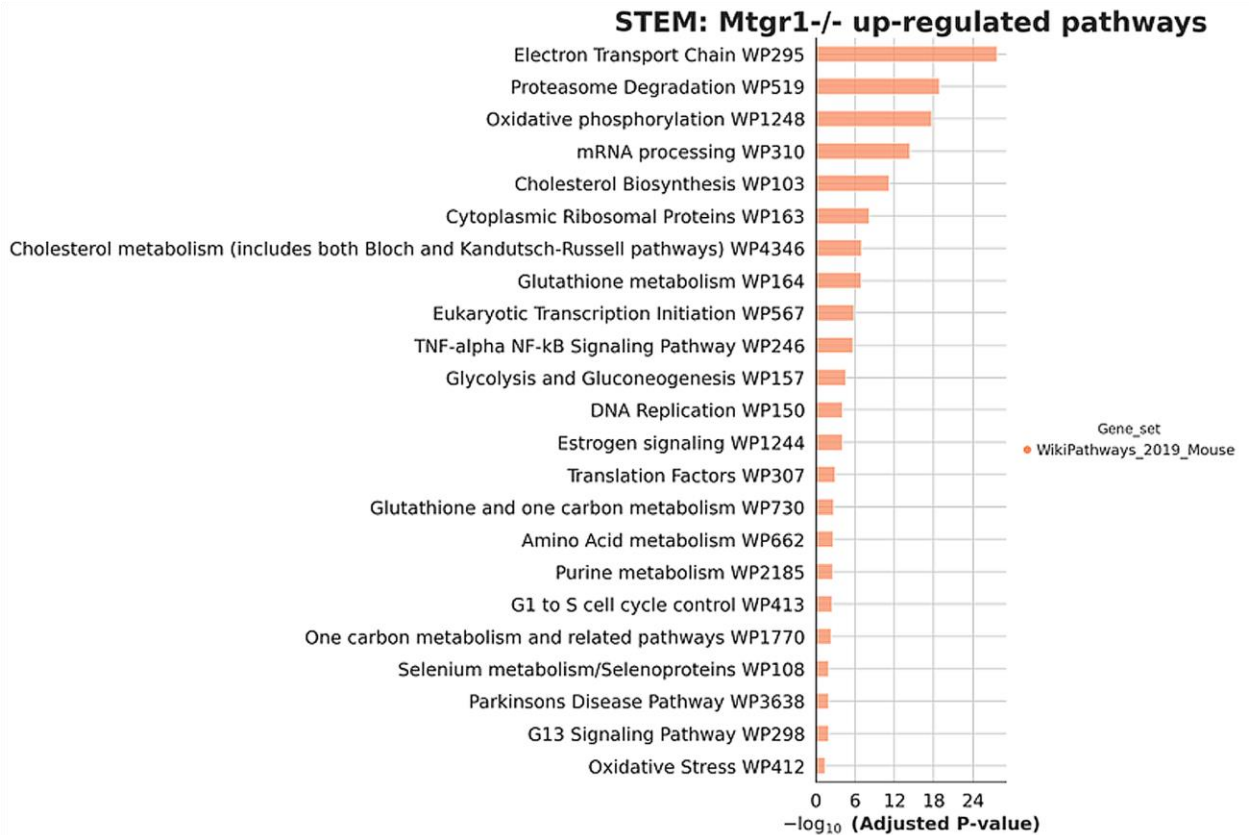



# Supplemental Figure 8

A

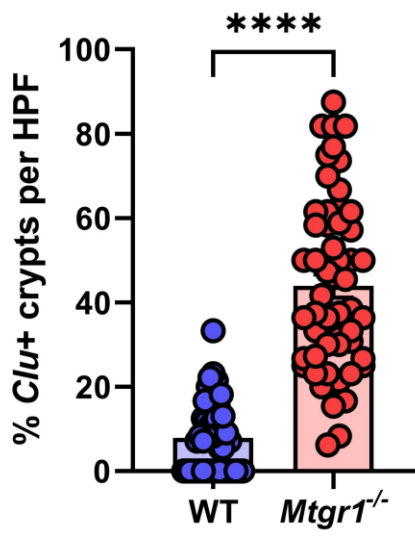

B

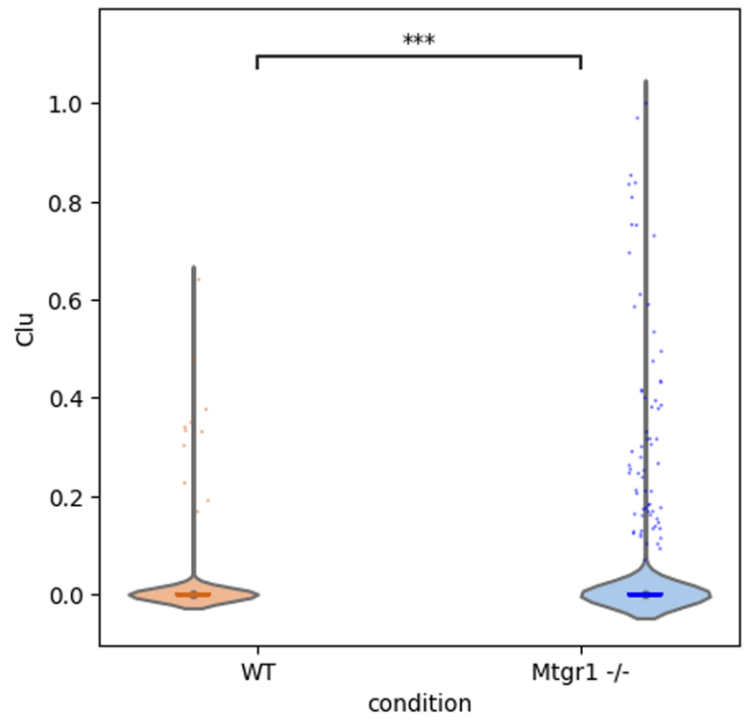

Supplement: 41418_2024_1346_MOESM2_ESM.pdf [file 41418_2024_1346_MOESM2_ESM.pdf]
